# Supplementary material
Source: HighWire-hosted journal article supplement (https://bmjopen.bmj.com/content/15/5/e091579)
Supplement: inline-supplementary-material-2 [file inline-supplementary-material-2.pdf]

SUPPLEMENTARY MATERIALS

Supplement 1: Assessment tools used to collect outcome measures.

Where a range is reported for Cronbach’s alpha, the highest and lowest coefficient for the subscales in the scale are reported.

| Assessment Tool and Associated Outcome Measure  | Number of items | Subscales                                                                                                                                                                                                                                                                                                                              | Cronbach’s alpha |
|-------------------------------------------------|-----------------|----------------------------------------------------------------------------------------------------------------------------------------------------------------------------------------------------------------------------------------------------------------------------------------------------------------------------------------|------------------|
| PAM-13: Patient activation and engagement       | 13              | N/A                                                                                                                                                                                                                                                                                                                                    | 0.81             |
| IES: Cancer-related distress                    | 15              | Intrusion (7 items), avoidance (8 items)                                                                                                                                                                                                                                                                                               | 0.86             |
| GAD7: Anxiety                                   | 7               | N/A                                                                                                                                                                                                                                                                                                                                    | 0.90             |
| EORTC QLQ-C30 and QLQ-BRE23: Quality of life    | 53              | Quality of life in cancer patients (30 items), Quality of life in breast cancer patients (23 items)                                                                                                                                                                                                                                    | 0.72-0.86        |
| CEQ: Experience of cancer care                  | 7               | N/A                                                                                                                                                                                                                                                                                                                                    | 0.94-0.95        |
| EORTC-INFO25: Quantity of treatment information | 25              | N/A                                                                                                                                                                                                                                                                                                                                    | >0.9             |
| heiQ: Experience with patient education         | 42              | Positive and active engagement in life (5 items), health directed behaviour (4 items), skill and technique acquisition (5 items), constructive attitudes and approaches (5 items), self monitoring and insight (7 items), health service navigation (5 items), social integration and support (5 items), emotional wellbeing (6 items) | 0.7-0.89         |
| MICRA: Impact of result disclosure after        | 25              | Distress, uncertainty,                                                                                                                                                                                                                                                                                                                 | 0.75-0.86        |

|                                              |     |                      |      |
|----------------------------------------------|-----|----------------------|------|
| genetic testing                              |     | positive experiences |      |
| KnowGene Scale: Knowledge of genetic testing | 16  | N/A                  | 0.83 |
| DT: Symptoms of distress                     | N/A | N/A                  | 0.80 |
| FACT-ES: Impact of endocrine symptoms        | 19  | N/A                  | 0.92 |
| DASI: Functional capacity                    | 12  | N/A                  | 0.78 |
